# Supplementary material for: A Lipid-Bilayer-On-A-Cup Device for Pumpless Sample Exchange
Source: MDPI journal article supplement (doi:10.3390/mi11121123), 2020-12-18
Supplement: s1 [file s1]

Supplementary Materials

# A Lipid-Bilayer-On-A-Cup Device for Pumpless Sample Exchange

Yoshihisa Ito, Yusuke Izawa, Toshihisa Osaki, Koki Kamiya, Nobuo Misawa, Satoshi Fujii, Hisatoshi Mimura, Norihisa Miki and Shoji Takeuchi

## S1. Correlation between fluorescence intensity and concentration of calcein

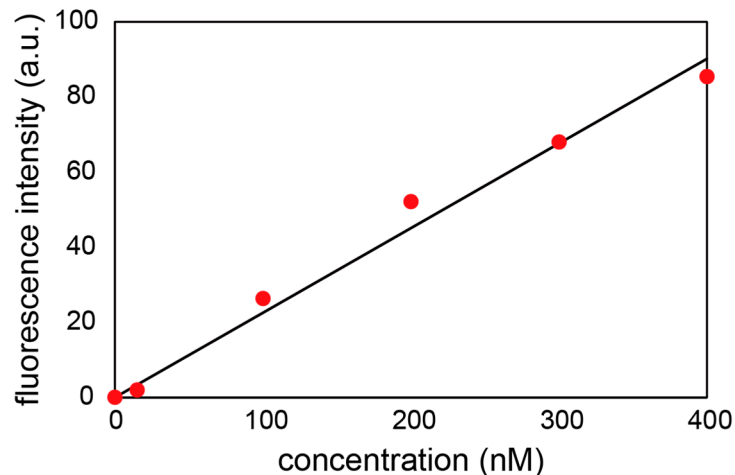

**Figure S1.** Correlation between fluorescence intensity and concentration of calcein. The fluorescence intensities of calcein at respective concentrations were measured using a fluorescence microscopy. The concentration inside of the mini-cup was then estimated using the calibration curve.

## S2. One-dimensional diffusion model

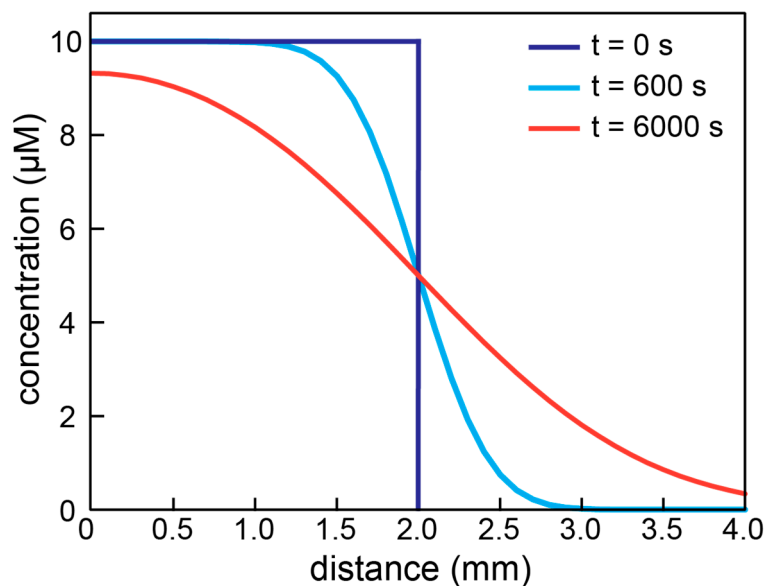

**Figure S2.** Diffusion of a molecule over time. A molecule held in a mini-cup ( $0 < x < 1$ ,  $C_0 = 10 \mu\text{M}$ ) diffuses by the fusion with a reservoir ( $1 < x$ ). The model does not consider convection flow.

Crank showed one-dimensional diffusion model similar to our system.

$$C(x, t) = \frac{C_0}{2} \left[ \operatorname{erf} \left( \frac{x+h}{2\sqrt{Dt}} \right) - \operatorname{erf} \left( \frac{x-h}{2\sqrt{Dt}} \right) \right] \quad (1)$$

where we applied the following parameters [1].

$$C_0 = 10 \mu\text{M} \quad (2)$$

$$D = 1.0 \times 10^{-10} \text{ m}^2/\text{s} \quad (3)$$

$$h = 2 \text{ mm}. \quad (4)$$

1. CRANK, J. *The Mathematics of Diffusion*. Oxford university press: Oxford, England, 1975.

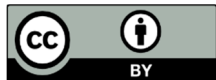

© 2020 by the authors. Submitted for possible open access publication under the terms and conditions of the Creative Commons Attribution (CC BY) license (<http://creativecommons.org/licenses/by/4.0/>).
